# Supplementary material
Source: PubMed Central journal article supplement (PMC2677393)
Supplement: NIHMS89837-supplement-01.pdf [file NIHMS89837-supplement-01.pdf]

Supplementary Figure 1.

5' PRIMER **CAAGARGGATCGATAGCAGTTC**

BuIIIA 1 **CAAGAAGGATCGATAGCAGTTC**CATGATGTCTAAACTGGGAGTCTTGTTGA 50  
 BuIIIB 1 **CAAGAAGGATCGATAGCAGTTC**CATGATGTCTAAACTGGGAGTCTTGTTGA 50  
 BuIIIC 1 **CAAGAGGGATCGATAGCAGTTC**CATGATGTCTAAACTGGGAGTCTTGTTGA 50

BuIIIA 51 CCATCTGTCTGCTTCTGTTTCCCCTTTTTGCTCTTCCGCAGGATGGAGAT 100  
 BuIIIB 51 CCATCTGTCTGCTTCTGTTTCCCCTTTTTGCTCTTCCGCAGGATGGAGAT 100  
 BuIIIC 51 CCATCTGTCTGCTTCTGTTTCCCCTTTTTGCTCTTCCGCAGGACGGAGAT 100

BuIIIA 101 CAACCTGCAGACCGACCTGCAGAGCGTATGCAGGACGACATTTTCATCTGA 150  
 BuIIIB 101 CAACCTGCAGACCGACCTGCAGAGCGTATGCAGGACGACATTTTCATCTGA 150  
 BuIIIC 101 CAACCTGCAGACCGACCTGCAGAGCGTATGCAGGACGACCTTTTCATCTGA 150

BuIIIA 151 GCAGAATTCCTTGCTTGAGAAGAGAGTTACTGACAGGTGCTGCAA----- 195  
 BuIIIB 151 GCAGAATCCCTTGCTTGAGAAGAGAGTTGGTGAAGGTGCTGCAA----- 195  
 BuIIIC 151 GCAGCATCCCTTGTTTGAGAAGAGAATTGTTGACAGGTGCTGCAACAAAG 200

BuIIIA 196 -A---GGGAAGAGGGAAATGCGGCAGATGGTGCAGAGATCACTCGCGTTGT 241  
 BuIIIB 196 -AACGGGAAGAGGGGGTGCAGAGATGGTGCAGAGATCACTCACGTTGT 244  
 BuIIIC 201 GGAACGGGAAGAGGGGGTGCAGCAGATGGTGCAGAGATCACTCACGTTGT 250

BuIIIA 242 TCGGTCGACGATAAGCTGTTGATGACCAG---CTTTGTTATCACGGCTA 288  
 BuIIIB 245 TCGGTCGACGATAACGTGTTGATGACCGAGGCTTTCGTTATCACGGCTA 294  
 BuIIIC 251 TCGGTCGACGATGAACTGTTGATGACCGAGGCTTTCGTTATCACGGCTA 300

BuIIIA 289 CATCAAGTGTCTAGT**GAATAAGTAAAATGATTGCAGT** 325  
 BuIIIB 295 CATCAAGTGTCTAGT**GAATAAGTAAAACGATTGCAGT** 331  
 BuIIIC 301 CATCAAGTGTCTAGT**GAATAAGTAAAACGATTGCAGT** 337

3' PRIMER-REV COMP. **GAATAAGTAAAAYGATTGCAGT**

5' PRIMER **CARGAAGGATCGATAGCAGTTC**  
 3' PRIMER **ACTGCAATCRTTTTACTTATTC**
