# Supplementary material
Source: PubMed Central journal article supplement (PMC2677393)

Holford et. al

Supplementary Figure 2.

Co-elution of One-Step and Two Step Folding

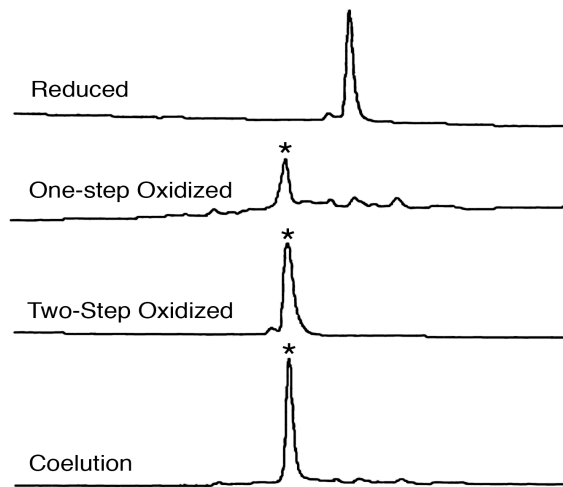

Supplement: NIHMS89837-supplement-02.pdf [file NIHMS89837-supplement-02.pdf]
